# Supplementary material
Source: MDPI journal article supplement (https://www.mdpi.com/2673-866X/4/2/13)
Supplement: s1 [file s1]

Archive with 1 entries (1 files):
- traumacare-2927073-supplementary.pdf
