# Supplementary material
Source: MDPI journal article supplement (https://www.mdpi.com/2673-866X/4/2/13)
Supplement: s1 [file s1 › traumacare-2927073-supplementary.pdf]

**Table S1. Correlations Between Facets of Mindfulness and PTSD Symptom Clusters (N = 214)**

|           | observe       | describe      | aware         | non-judge     | non-react     | re-exp        | avoid         | neg-cog       | arousal       |
|-----------|---------------|---------------|---------------|---------------|---------------|---------------|---------------|---------------|---------------|
| observe   |               | <i>0.405</i>  | <i>-0.198</i> | <i>-0.161</i> | <i>0.345</i>  | <i>0.154</i>  | <i>0.095</i>  | <i>0.043</i>  | <i>0.165</i>  |
| describe  | <i>0.405</i>  |               | <i>0.133</i>  | <i>0.192</i>  | <i>0.405</i>  | <i>-0.051</i> | <i>-0.076</i> | <i>-0.113</i> | <i>-0.13</i>  |
| aware     | <i>-0.198</i> | <i>0.133</i>  |               | <i>0.328</i>  | <i>-0.074</i> | <i>-0.159</i> | <i>-0.145</i> | <i>-0.246</i> | <i>-0.367</i> |
| non-judge | <i>-0.161</i> | <i>0.192</i>  | <i>0.328</i>  |               | <i>-0.017</i> | <i>-0.426</i> | <i>-0.438</i> | <i>-0.585</i> | <i>-0.54</i>  |
| non-react | <i>0.345</i>  | <i>0.405</i>  | <i>-0.074</i> | <i>-0.017</i> |               | <i>-0.063</i> | <i>-0.019</i> | <i>0.009</i>  | <i>0.027</i>  |
| re-exp    | <i>0.154</i>  | <i>-0.051</i> | <i>-0.159</i> | <i>-0.426</i> | <i>-0.063</i> |               | <i>0.712</i>  | <i>0.672</i>  | <i>0.68</i>   |
| avoid     | <i>0.095</i>  | <i>-0.076</i> | <i>-0.145</i> | <i>-0.438</i> | <i>-0.019</i> | <i>0.712</i>  |               | <i>0.662</i>  | <i>0.565</i>  |

*Note:* Observe, Describe, Aware(ness), Non-judge(ment), and Non-react(ivity) represent the facets of the Five Facet Mindfulness Questionnaire (FFMQ). Re-exp = Re-experiencing symptoms (cluster B of Posttraumatic Stress Disorder; PTSD). Avoid = Avoidance symptoms (cluster C of PTSD). Neg-cog = Negative Alterations in Cognition and Mood (cluster D of PTSD). Arousal = symptoms related to increased arousal and reactivity (cluster E of PTSD).
